# Supplementary material for: Renal allograft rejection, lymphocyte infiltration, and de novo donor-specific antibodies in a novel model of non-adherence to immunosuppressive therapy
Source: PubMed Central journal article supplement (PMC5735914; doi:10.1186/s12865-017-0236-6), 2017-12-19
Supplement: 12865_2017_236_MOESM3_ESM.pdf [file 12865_2017_236_MOESM3_ESM.pdf]

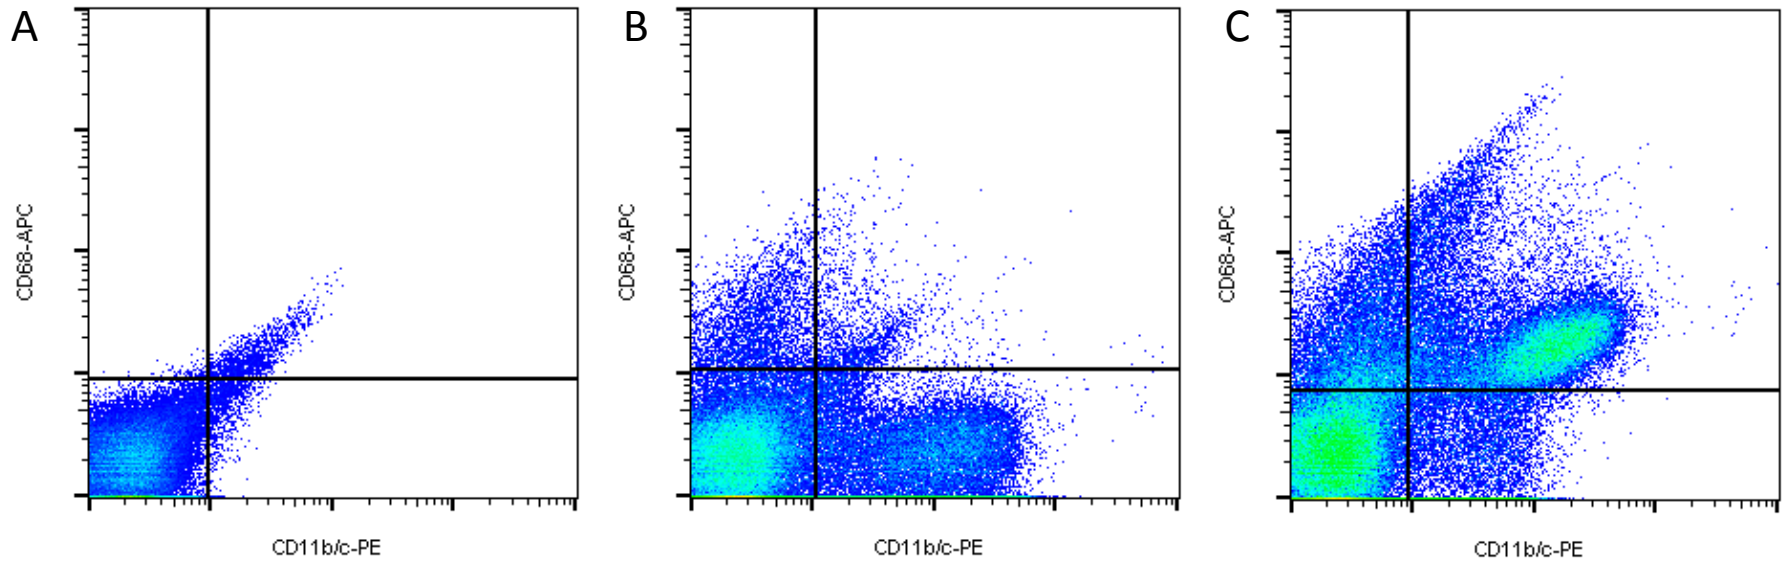

- A) Unstained rat splenocytes
- B) Anti-CD11b/c-PE only
- C) Anti-CD68-APC and anti-CD11b/c-PE
