# Supplementary material for: Renal allograft rejection, lymphocyte infiltration, and de novo donor-specific antibodies in a novel model of non-adherence to immunosuppressive therapy
Source: Springer Nature journal article supplement (doi:10.1186/s12865-017-0236-6), 2017-12-01

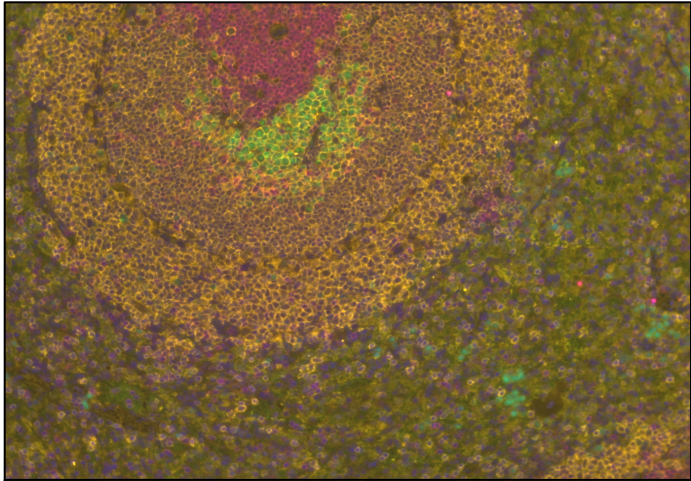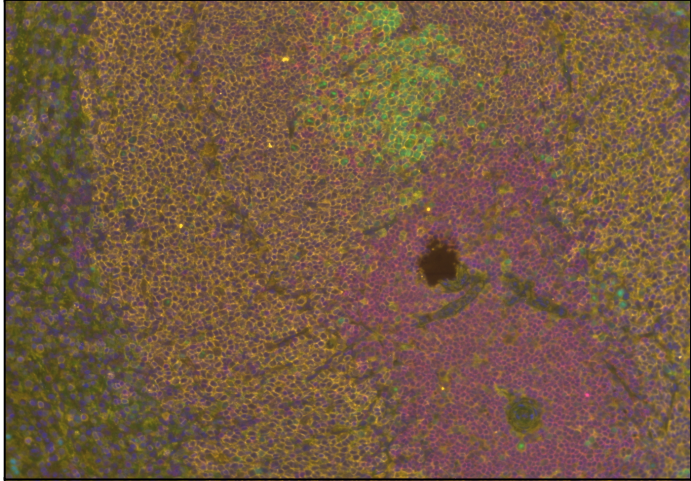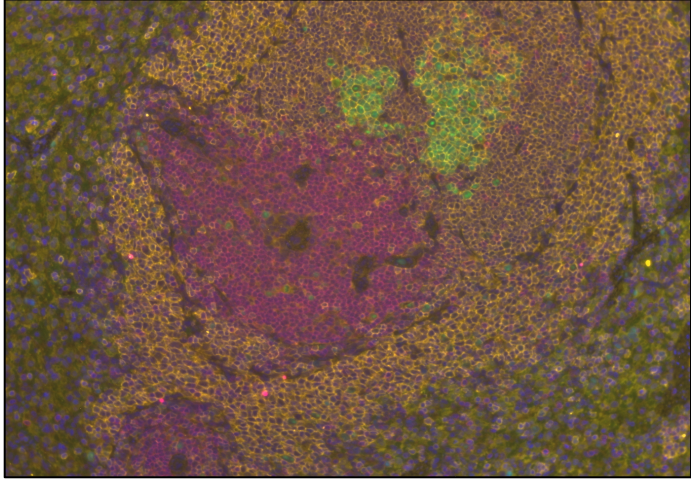

Supplement: MOESM1 [file 15319558]
